# Supplementary material for: The Role of Neuregulin-1 in Steatotic and Non-Steatotic Liver Transplantation from Brain-Dead Donors
Source: MDPI journal article supplement (doi:10.3390/biomedicines10050978), 2022-04-23
Supplement: s1 [file s1]

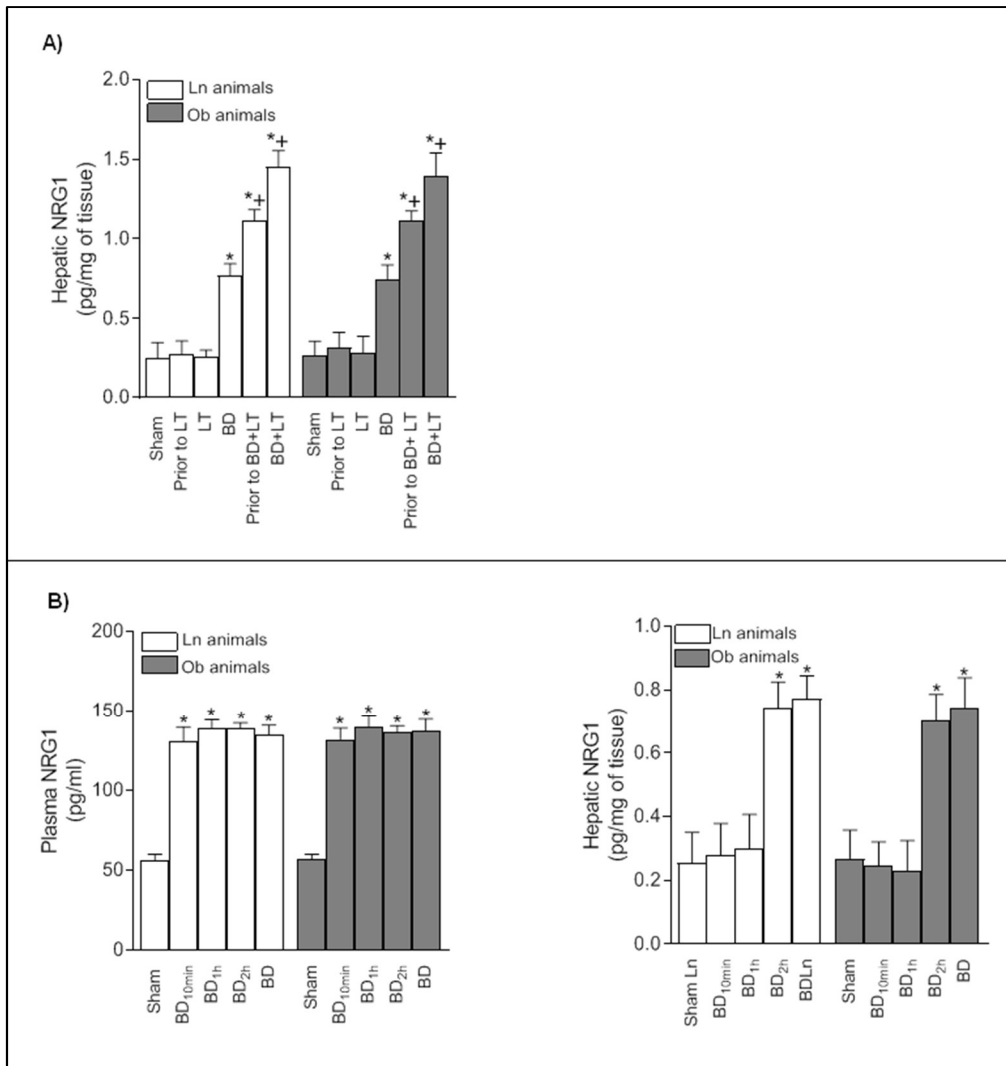

**Supplementary Figure S1.** Origin of NRG1 in LT from DBDs in a genetic obesity model. (A) Levels of NRG1 in steatotic and non-steatotic livers. B) NRG1 levels in plasma and liver at 10 min, 2 and 6 hours after the BD induction. \*P < 0.05 versus Sham; +P < 0.05 versus LT.

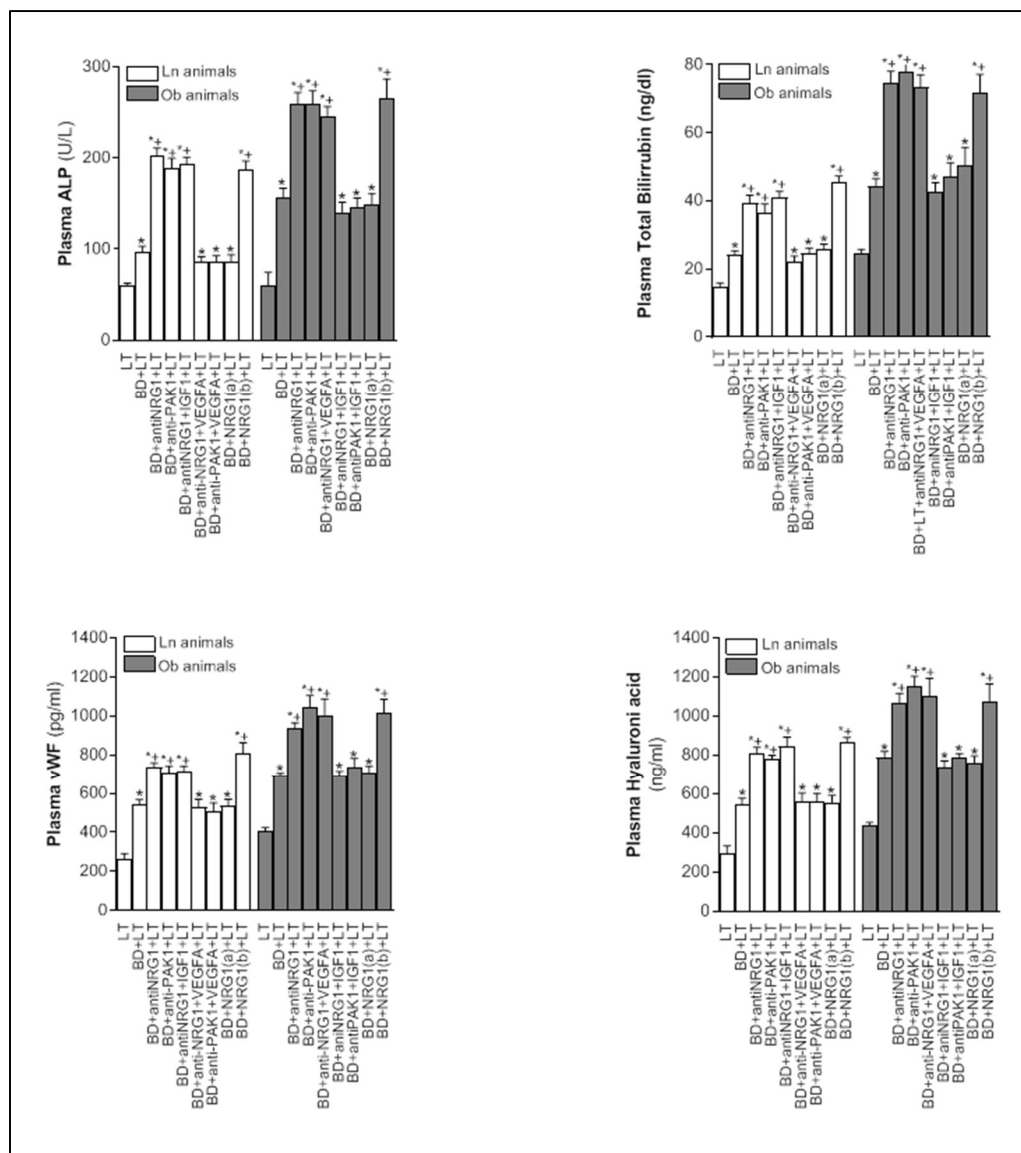

**Supplementary Figure S2.** Relevance of NRG1 on hepatic functionality and cell endothelial damage in steatotic and non-steatotic LT from DBDs in a nutritional obesity model. ALP, total bilirubin levels, vWF, and HA levels in plasma. \*P < 0.05 versus LT; +P < 0.05 versus BD+LT.
